# Supplementary figures and images for: GSK-3β signaling determines autophagy activation in the breast tumor cell line MCF7 and inclusion formation in the non-tumor cell line MCF10A in response to proteasome inhibition
Source: PubMed Central journal article supplement — Cell Death Dis. 2013 Apr 4;4(4):e572–. doi: 10.1038/cddis.2013.95 (PMC3668630; doi:10.1038/cddis.2013.95), 2013-04-04

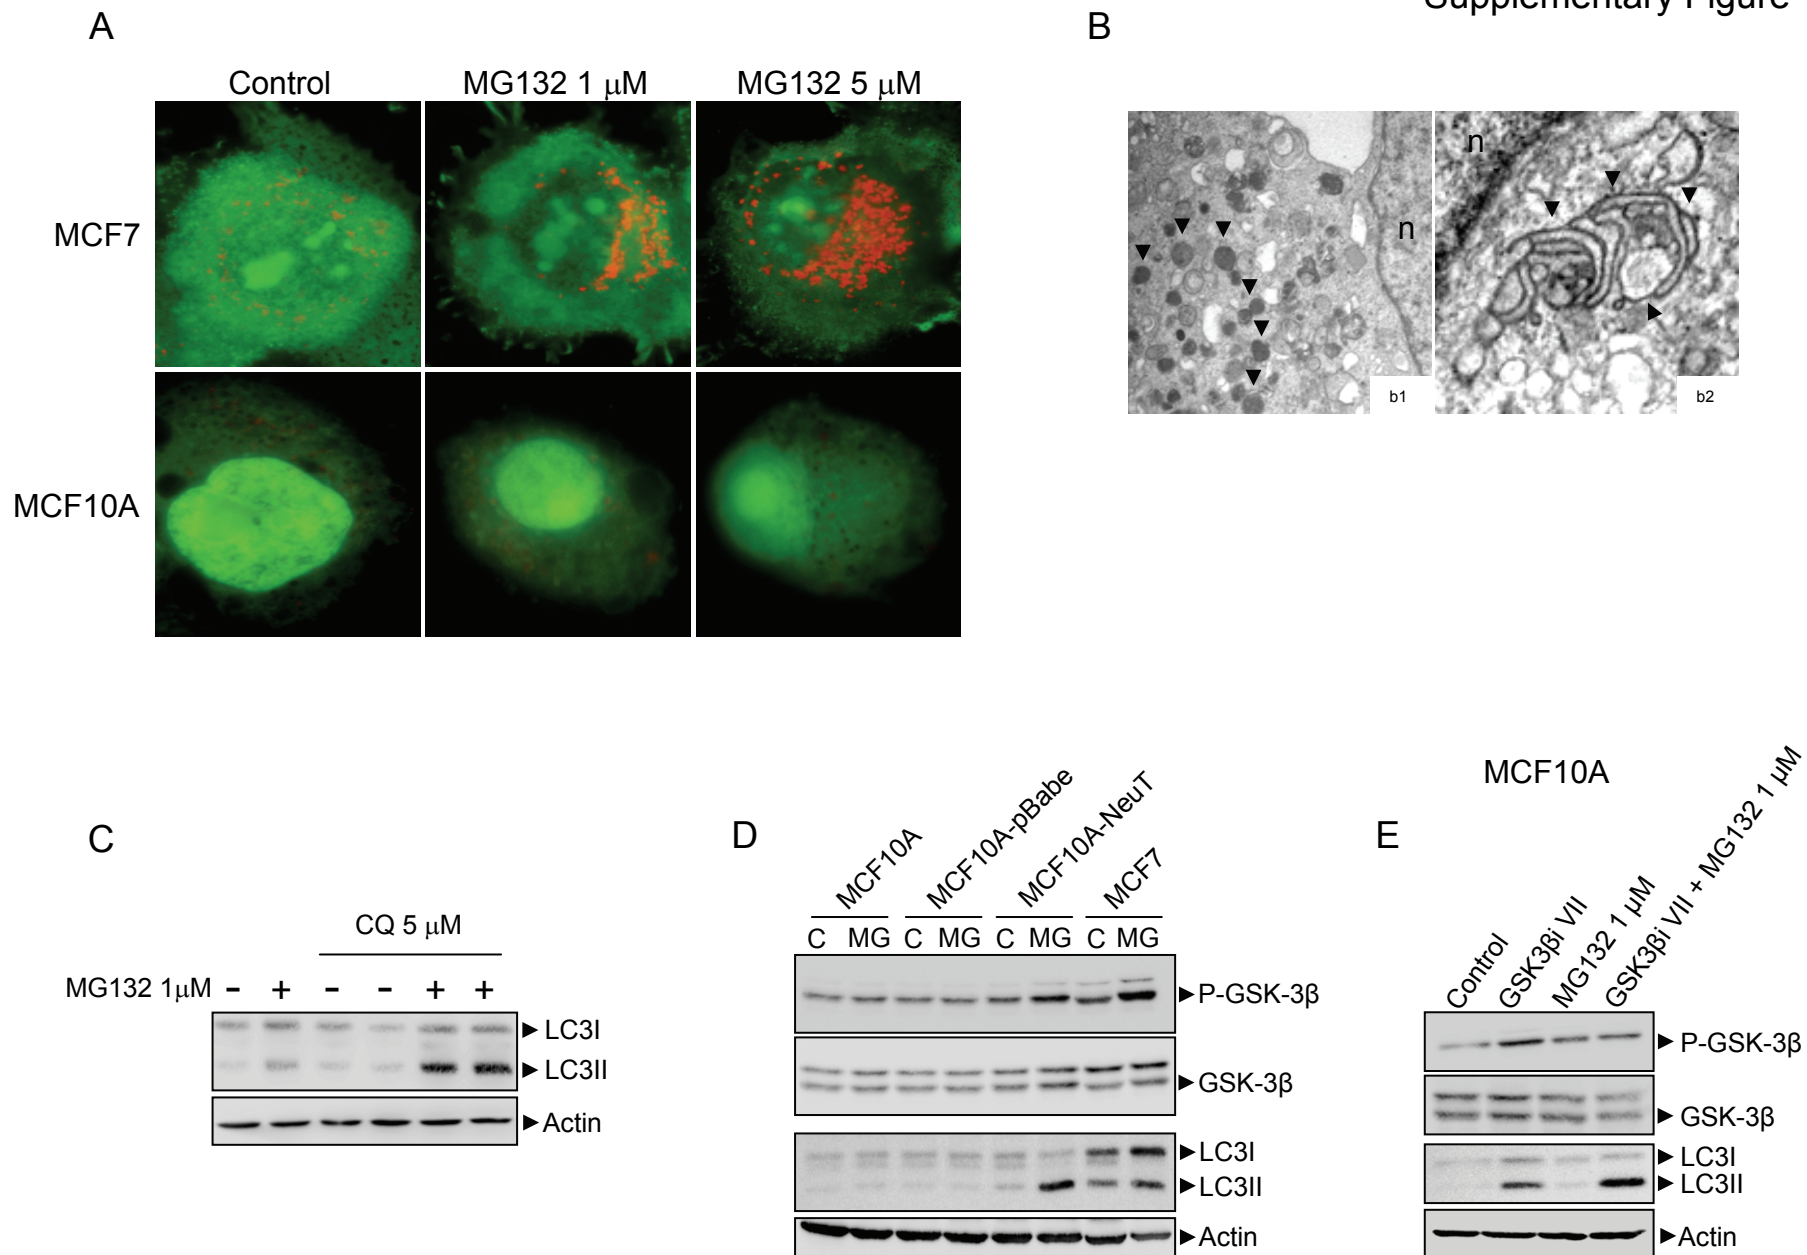

Supplement: cddis201395x1.pdf [file cddis201395x1.pdf]
